# Supplementary material for: Transabdominal ultrasonography for the preoperative diagnosis of advanced lymph node metastasis in patients with colon cancer: A retrospective cohort study
Source: Research Square preprint supplement (doi:10.21203/rs.3.rs-745389/v1), 2021-07-28
Supplement: Supplementary file 1 [file b99183a4bad0882bcda1c5e8.xlsx]

## Sheet: Sheet1
Table 4. Diagnostic capabilities for advanced lymph node metastasis by computed tomography and ultrasonography
Diagnostic abilities	CT	US	P-value
Multiple lymph node metastases
Sensitivity	18.4% (7/38)	47.4% (18/38)	0.0138
Specificity	90.7% (137/151)	84.1% (127/151)	0.118
PPV	33.3% (7/21)	42.9% (18/42)	0.588
NPV	81.5% (137/168)	86.4% (127/147)	0.284
Accuracy	76.2% (144/189)	76.7% (145/189)	1
DOR (95% CI)	2.21 (0.85-5.80)	4.76 (2.20-10.24)
N2 stage
Sensitivity	5.6% (1/18)	27.8% (5/18)	0.177
Specificity	95.9% (164/171)	91.2% (156/171)	0.121
PPV	12.5% (1/8)	25.0% (5/20)	0.64
NPV	90.6% (164/181)	92.3% (156/169)	0.703
Accuracy	87.3% (165/189)	85.2% (161/189)	0.654
DOR (95% CI)	1.38 (0.21-9.31)	4.00 (1.31-12.36)
CT, computed tomography; US, transabdominal ultrasonography
PPV, positive predictive value; NPV, negative predictive value
DOR, diagnostic odds ratio; CI, confidence interval
