# Supplementary material for: Transabdominal ultrasonography for the preoperative diagnosis of advanced lymph node metastasis in patients with colon cancer: A retrospective cohort study
Source: Research Square preprint supplement (doi:10.21203/rs.3.rs-745389/v1), 2021-07-28
Supplement: Supplementary file 2 [file caa3384f175c2b26f27abae6.xlsx]

## Sheet: Sheet1
Supplementaly table 1. Diagnostic capabilities of lymph node features by ultrasonography
Lymph node features	Sensitivity	Specificity	PPV	NPV	Accuracy
Long axis (>9mm vs. <9mm)	0.608	0.574	0.574	0.608	0.59
Short axis (>7mm vs. <7mm)	0.51	0.741	0.65	0.615	0.629
S/L ratio (>0.75 vs. <0.75)	0.51	0.574	0.531	0.554	0.543
Echo level (isoechoic/hypoechoic vs. hyperechoic)	0.843	0.111	0.473	0.429	0.467
Echo texture (homogenous vs. heterogeneous)	0.49	0.352	0.417	0.422	0.419
Hilar echo (absence vs. presence)	0.843	0.296	0.531	0.667	0.562
Expansive appearance (presence vs. absence)	0.412	0.704	0.568	0.559	0.562
Peripheral or mixed vascularity (presence vs. absence)	0.549	0.685	0.622	0.617	0.619
PPV, positive predictive value; NPV, negative predictive value
